# Supplementary material for: The longstanding challenge of the nanocrystallization of 1,3,5-trinitroperhydro-1,3,5-triazine (RDX)
Source: Beilstein J Nanotechnol. 2017 Feb 17;8:452–66. doi: 10.3762/bjnano.8.49 (PMC5331269; doi:10.3762/bjnano.8.49)
Supplement: File 1 — CSV data on fine energetic materials. [file Beilstein_J_Nanotechnol-08-452-s001.csv]

Title	Compound	Synthesis	SynDetail	Technique	Value	Unit	Comment
Preparation of Micronized ?-HMX Using Supercritical Carbon Dioxide as Antisolvent	(?+?)HMX	GAS		Laser Diffraction	5300	nm	median /irregular + prism-like
For Peer Review Preparation and Characterization of Spray-Dried Microspheric RDX, CL-20 and HMX	CL-20	spray dry		SEM	483.05	nm	median (<mean)
Study of nano-nitramine explosives: preparation, sensitivity and application	CL-20	raw		SEM	49290	nm	median
Preparation and Characterization of Nano-CL-20 Explosive	CL-20	raw	15mu		15000	nm
Study of nano-nitramine explosives: preparation, sensitivity and application	CL-20	milling	freeze drying	SEM	180	nm	median
Preparation and Characterization of Nano-CL-20 Explosive	CL-20	spray into anti solvent	no sonication	SEM	600	nm
Preparation and Characterization of Nano-CL-20 Explosive	CL-20	spray into anti solvent	sonication	SEM	95	nm
Nanoscale 2CL-20·HMX high explosive cocrystal synthesized by bead milling	CL-20:HMX 2:1	milling	60min	SEM	200	nm	approx. Mean below
Preparation and characterization of nano-1,1-diamino-2,2-dinitroethene (FOX-7) explosive	FOX-7	ultrasonic crystallisation		SEM	78	nm	30–200 nm Rectangles
Preparation and characterization of nano-1,1-diamino-2,2-dinitroethene (FOX-7) explosive	FOX-7	ultrasonic crystallisation		XRD	36	nm	scherre classic Average on 3peaks
Preparation and characterization of nano-1,1-diamino-2,2-dinitroethene (FOX-7) explosive	FOX-7	in a beaker		SEM	340	nm
Nano Cyclotetramethylene Tetranitramine Particles Prepared by a Green Recrystallization Process	HMX	spray into anti solvent		SEM	80	nm	approx.
Nano Cyclotetramethylene Tetranitramine Particles Prepared by a Green Recrystallization Process	HMX	spray into anti solvent		DLS	81.4	nm	median 40-130
Control of the Particle Size of Submicron HMX Explosive by Spraying in Non-Solvent.	HMX	spray into anti solvent		SEM	14980	nm
Formation of Energetic Materials Using Supercritical Fluids	HMX	PCA		SEM/BET/DLS	2300	nm
Preparation and Performance of Nano HMX/TNT Cocrystals	HMX	raw		SEM	1000	nm
Preparation of Micronized ?-HMX Using Supercritical Carbon Dioxide as Antisolvent	HMX	GAS		Laser Diffraction	12900	nm	median /prism-like
Nano Cyclotetramethylene Tetranitramine Particles Prepared by a Green Recrystallization Process	HMX	raw		SEM	100000	nm	approx.
On the Reliability of Sensitivity Test Methods for Submicrometer-Sized RDX and HMX Particles	HMX	raw			150000	nm
Synthesis and Desensitization of Nano-?-HMX	HMX	SFE		AFM	116	nm	pressed+microtome (variance 41 nm)
For Peer Review Preparation and Characterization of Spray-Dried Microspheric RDX, CL-20 and HMX	HMX	spray dry		SEM	518.25	nm	median (<mean)
Study of nano-nitramine explosives: preparation, sensitivity and application	HMX	raw		SEM	120360	nm	median
Control of the Particle Size of Submicron HMX Explosive by Spraying in Non-Solvent.	HMX	spray into anti solvent	+surfactant (isopropyl alcohol)	SEM	617	nm
Particle Size Effects on Thermal Decomposition of Energetic Material	HMX	raw	125um	SEM	125000	nm
Optimized Synthesis of HMX Nanoparticles Using Antisolvent Precipitation Method	HMX	100mL AC / water	30°C 100mM	DLS	385	nm	±59
Optimized Synthesis of HMX Nanoparticles Using Antisolvent Precipitation Method	HMX	100mL AC / water	30°C 25mM	DLS	253	nm	±9
Optimized Synthesis of HMX Nanoparticles Using Antisolvent Precipitation Method	HMX	100mL AC / water	30°C 50mM	DLS	277	nm	±19
Optimized Synthesis of HMX Nanoparticles Using Antisolvent Precipitation Method	HMX	100mL AC / water	30°C 5mM	DLS	168	nm	±7
Particle Size Effects on Thermal Decomposition of Energetic Material	HMX	raw	350um	SEM	350000	nm
Optimized Synthesis of HMX Nanoparticles Using Antisolvent Precipitation Method	HMX	100mL AC / water	70°C 100mM	DLS	258	nm	±12
Optimized Synthesis of HMX Nanoparticles Using Antisolvent Precipitation Method	HMX	100mL AC / water	70°C 25mM	DLS	229	nm	±3
Optimized Synthesis of HMX Nanoparticles Using Antisolvent Precipitation Method	HMX	100mL AC / water	70°C 50mM	DLS	245	nm	±12
Optimized Synthesis of HMX Nanoparticles Using Antisolvent Precipitation Method	HMX	100mL AC / water	70°C 5mM	DLS	189	nm	±7
Study of nano-nitramine explosives: preparation, sensitivity and application	HMX	milling	freeze drying	SEM	160	nm	median
Investigation of HMX-Based Nanocomposites	HMX/PVOH 95/5	raw+spraydry			2000	nm
Investigation of HMX-Based Nanocomposites	HMX/PVOH 95/5	milling		DLS	300	nm
Investigation of HMX-Based Nanocomposites	HMX/PVOH 95/5	milling+spraydry	300nm	SEM	300	nm	roughly consistent with the DLS
Investigation of HMX-Based Nanocomposites	HMX/PVOH 95/5	milling+spraydry	500nm		500	nm
Preparation and Performance of Nano HMX/TNT Cocrystals	HMX/TNT 80/20	spray dry		SEM	5000	nm	1-10 microns spherical
Preparation and Performance of Nano HMX/TNT Cocrystals	HMX:TNT	spray dry		SEM	125	nm	50-200 nm potatoes
Synthesis and Desensitization of Nano-?-HMX	HMX+licowax	SFE		AFM	130	nm	pressed+microtome (variance 84 nm)
Study of nano-nitramine explosives: preparation, sensitivity and application	RDX	raw		SEM	83640	nm	median
On the Reliability of Sensitivity Test Methods for Submicrometer-Sized RDX and HMX Particles	RDX	electrospray		SEM	400	nm
A Successive and Scalable Process for Preparing Spherical Submicrometer-Sized RDX by the SEDS Process	RDX	SEDS		SEM	767	nm
On the Reliability of Sensitivity Test Methods for Submicrometer-Sized RDX and HMX Particles	RDX	plasma		SEM	500	nm	200 to 900 nm and prismatic and spherical shapes
Continuous Crystallization of Submicrometer Energetic Compounds	RDX	ultrasonic crystallisation		SEM	400	nm	aggregates of 20-50 nm
Preparation of submicron-sized RDX particles by rapid expansion of solution using compressed liquid dimethyl ether	RDX	RESS		SEM	360	nm
Synthesis of Energetic Materials by Rapid Expansion of a Supercritical Solution into Aqueous Solution (RESS-AS) Process	RDX	RESS		DLS	150	nm	approx
Supercritical Antisolvent Micronization of Cyclotrimethylenetrinitramin: Influence of the Organic Solvent	RDX	raw		Laser Diffraction	85100	nm
For Peer Review Preparation and Characterization of Spray-Dried Microspheric RDX, CL-20 and HMX	RDX	spray dry		SEM	518.25	nm	median (<mean)
A Successive and Scalable Process for Preparing Spherical Submicrometer-Sized RDX by the SEDS Process	RDX	raw		SEM	40000	nm	approx.
Preparation and Characterization of Ultrafine RDX	RDX	raw		DLS	60000	nm	approx
On the Reliability of Sensitivity Test Methods for Submicrometer-Sized RDX and HMX Particles	RDX	raw			350000	nm
Formation of RDX nanoparticles by rapid expansion of supercritical solution : in situ characterization by laser scattering	RDX	RESS		SEM	15000	nm
Kinetic investigation on thermal decomposition of hexahydro-1,3,5-trinitro-1,3,5-triazine (RDX) nanoparticles	RDX	raw		SEM	50000	nm
Preparation and characterization of cyclo-1,3,5-trimethylene-2,4,6-trinitramine (RDX) powder: Comparison of microscopy, dynamic light scattering and field-flow fractionation for size characterization	RDX	SAS		DLS	3000	nm
Effect of Drying on Particle Size and Sensitivities of Nano hexahydro-1,3,5-trinitro-1,3,5-triazine	RDX	raw		Laser Diffraction	88030	nm	median
Preparation and characterization of cyclo-1,3,5-trimethylene-2,4,6-trinitramine (RDX) powder: Comparison of microscopy, dynamic light scattering and field-flow fractionation for size characterization	RDX	SAS		AsFlFFF	6000	nm
Formation of Energetic Materials Using Supercritical Fluids	RDX	PCA		SEM/BET/DLS	16600	nm
Energetic Materials: Crystallization, Characterization and Insensitive Plastic Bonded Explosives	RDX	spray dry		SEM	400	nm	bottom limit of the range
Preparation and characterization of cyclo-1,3,5-trimethylene-2,4,6-trinitramine (RDX) powder: Comparison of microscopy, dynamic light scattering and field-flow fractionation for size characterization	RDX	SAS		OM	7000	nm
Production of Nanocrystalline RDX by Rapid Expansion of Supercritical Solutions	RDX	RESS		SEM	110	nm	± 30nm lognorm potatoes like sfe
Preparation and Characterization of Ultrafine RDX	RDX	in a beaker	stirring 50ml/h n-hexane/acetone 100:1 60% yeld	DLS	4300	nm	median bi-modal 1st mode at 800nm approx
Preparation and Characterization of Ultrafine RDX	RDX	in a beaker	stirring 50ml/h n-hexane/acetone 100:1 60% yeld	BET	850	nm
Preparation and impact sensitivity of nanometer explosive powder of RDX	RDX	raw	??		66000	nm	written in Chinese
Preparation and impact sensitivity of nanometer explosive powder of RDX	RDX	spray dry	???	TEM	60	nm	written in Chinese
Preparation and impact sensitivity of nanometer explosive powder of RDX	RDX	spray dry	????	TEM	40	nm	written in Chinese
Preparation and impact sensitivity of nanometer explosive powder of RDX	RDX	spray dry	?????	TEM	145	nm	approx. from article written in Chinese
Evaporation Crystallization of RDX by Ultrasonic Spray	RDX	ultrasonic crystallisation	0.5 wt% RDX/acetone 175°C	SEM	800	nm	± 0.3 ?m
Kinetic investigation on thermal decomposition of hexahydro-1,3,5-trinitro-1,3,5-triazine (RDX) nanoparticles	RDX	milling	100h milling	SEM	180	nm	mean
Physicochemical characteristics of the components of energetic condensed systems	RDX	PVD	137°? for 150 min	TEM	35	nm
Preparation of Nano-RDX by Evaporation Assisted Solvent/Antisolvent Interaction	RDX	in a beaker	200 mM 70°C	SEM	172	nm	±66
Preparation of Nano-RDX by Evaporation Assisted Solvent/Antisolvent Interaction	RDX	in a beaker	200 mM 70°C	DLS	216	nm	±21
Characterization of the Morphology of RDX Particles Formed by Laser Ablation	RDX	LASER	200-mJ pulse and 75-mJ pulse	SMPS	64	nm
Characterization of the Morphology of RDX Particles Formed by Laser Ablation	RDX	LASER	200-mJ pulse and 75-mJ pulse	SEM	64	nm
Kinetic investigation on thermal decomposition of hexahydro-1,3,5-trinitro-1,3,5-triazine (RDX) nanoparticles	RDX	milling	24h milling	SEM	300	nm	mean
Evaporation Crystallization of RDX by Ultrasonic Spray	RDX	ultrasonic crystallisation	4 wt% RDX/acetone 175°C	SEM	2600	nm	± 0.4 ?m
Kinetic investigation on thermal decomposition of hexahydro-1,3,5-trinitro-1,3,5-triazine (RDX) nanoparticles	RDX	milling	48h milling	SEM	250	nm	mean
Preparation of Nano-RDX by Evaporation Assisted Solvent/Antisolvent Interaction	RDX	in a beaker	5 mM 70°C	DLS	262	nm	±27
Preparation of Nano-RDX by Evaporation Assisted Solvent/Antisolvent Interaction	RDX	in a beaker	5 mM 70°C	SEM	38	nm	±15
Production of Submicrometer-Sized Hexahydro-1,3,5-trinitro-1,3,5-triazine by Drowning-Out	RDX	spray into anti solvent	5% RDX acetone	SEM	1120	nm
Structural Characterization of RDX-Based Explosive Nanocomposites	RDX	RESS	a	SEM	200	nm
Structural Characterization of RDX-Based Explosive Nanocomposites	RDX	RESS	b	SEM	500	nm
Production and Sensitivity Evaluation of Nanocrystalline RDX-based Explosive Compositions	RDX	milling	fluid energy milled		4000	nm	?
Effect of Drying on Particle Size and Sensitivities of Nano hexahydro-1,3,5-trinitro-1,3,5-triazine	RDX	milling	freeze drying	SEM	160	nm	median
Study of nano-nitramine explosives: preparation, sensitivity and application	RDX	milling	freeze drying	SEM	160	nm	median
Formation and Characterization of Nano-sized RDX Particles Produced Using the RESS-AS Process	RDX	RESS-AS/RESOLV	NH4OH / vacuum dried	DLS	30	nm	consistent with the FE-SEM evaluation
Synthesis of Energetic Materials by Rapid Expansion of a Supercritical Solution into Aqueous Solution (RESS-AS) Process	RDX	RESS-AS/RESOLV	NVP / vacuum dried	DLS	37	nm	one micron small peak too
Synthesis of Energetic Materials by Rapid Expansion of a Supercritical Solution into Aqueous Solution (RESS-AS) Process	RDX	RESS-AS/RESOLV	PEI ph5&7 / vacuum dried	DLS	37	nm	several peaks / 60nm mini observed
Formation and Characterization of Nano-sized RDX Particles Produced Using the RESS-AS Process	RDX	RESS-AS/RESOLV	PEI ph7 / vacuum dried	DLS	30	nm	consistent with the FE-SEM evaluation
Synthesis of Energetic Materials by Rapid Expansion of a Supercritical Solution into Aqueous Solution (RESS-AS) Process	RDX	RESS-AS/RESOLV	plain water / vacuum dried	DLS	30	nm	aggregation and coarsening of nano-sized RDX particles by Ostwald ripening
Synthesis of Energetic Materials by Rapid Expansion of a Supercritical Solution into Aqueous Solution (RESS-AS) Process	RDX	RESS-AS/RESOLV	plain water / vacuum dried	SEM	34	nm	aggregation and coarsening of nano-sized RDX particles by Ostwald ripening
Formation and Characterization of Nano-sized RDX Particles Produced Using the RESS-AS Process	RDX	RESS-AS/RESOLV	plain water / vacuum dried	DLS	100	nm	aggregation and coarsening of nano-sized RDX particles by Ostwald ripening
Formation and Characterization of Nano-sized RDX Particles Produced Using the RESS-AS Process	RDX	RESS-AS/RESOLV	PVP 360k / vacuum dried	DLS	50	nm	consistent with the FE-SEM evaluation
Synthesis of Energetic Materials by Rapid Expansion of a Supercritical Solution into Aqueous Solution (RESS-AS) Process	RDX	RESS-AS/RESOLV	PVP 55k / vacuum dried	DLS	60	nm	several peaks / 60nm mini observed
Supercritical Antisolvent Micronization of Cyclotrimethylenetrinitramin: Influence of the Organic Solvent	RDX	GAS/SAS	solvent AC	Laser Diffraction	17700	nm
Supercritical Antisolvent Micronization of Cyclotrimethylenetrinitramin: Influence of the Organic Solvent	RDX	GAS/SAS	solvent ACN	Laser Diffraction	6600	nm
Supercritical Antisolvent Micronization of Cyclotrimethylenetrinitramin: Influence of the Organic Solvent	RDX	GAS/SAS	solvent CHN	Laser Diffraction	2620	nm
Supercritical Antisolvent Micronization of Cyclotrimethylenetrinitramin: Influence of the Organic Solvent	RDX	GAS/SAS	solvent DMF	Laser Diffraction	51900	nm
Supercritical Antisolvent Micronization of Cyclotrimethylenetrinitramin: Influence of the Organic Solvent	RDX	GAS/SAS	solvent DMSO	Laser Diffraction	12820	nm
Supercritical Antisolvent Micronization of Cyclotrimethylenetrinitramin: Influence of the Organic Solvent	RDX	GAS/SAS	solvent NMP	Laser Diffraction	11450	nm
Effect of Drying on Particle Size and Sensitivities of Nano hexahydro-1,3,5-trinitro-1,3,5-triazine	RDX	milling	supercritical drying	SEM	200	nm	median
Effect of Drying on Particle Size and Sensitivities of Nano hexahydro-1,3,5-trinitro-1,3,5-triazine	RDX	milling	vacuum drying	SEM	18690	nm	median
Effect of Drying on Particle Size and Sensitivities of Nano hexahydro-1,3,5-trinitro-1,3,5-triazine	RDX	milling	water bath oven drying	SEM	15320	nm	median
Insensitive High Cyclotrimethylenetrinitramine (RDX) Nanostructured Explosives Derived from Solvent/Nonsolvent Method in a Bacterial Cellulose (BC) Gelatin Matrix	RDX/BC	DMF+freeze drying	0,175g RDX /ml	XRD	30.24	nm	XRD
Insensitive High Cyclotrimethylenetrinitramine (RDX) Nanostructured Explosives Derived from Solvent/Nonsolvent Method in a Bacterial Cellulose (BC) Gelatin Matrix	RDX/BC	DMF+freeze drying	0,25g RDX /ml	XRD	36.34	nm	XRD
Insensitive High Cyclotrimethylenetrinitramine (RDX) Nanostructured Explosives Derived from Solvent/Nonsolvent Method in a Bacterial Cellulose (BC) Gelatin Matrix	RDX/BC	DMF+freeze drying	0,2g RDX /ml	XRD	32.38	nm	XRD
Insensitive High Cyclotrimethylenetrinitramine (RDX) Nanostructured Explosives Derived from Solvent/Nonsolvent Method in a Bacterial Cellulose (BC) Gelatin Matrix	RDX/BC	DMF+freeze drying	0,3g RDX /ml	XRD	48.81	nm	XRD
Evaporation Crystallization of RDX by Ultrasonic Spray	RDX/Brij97	ultrasonic crystallisation	100ppm	SEM	2900	nm	± 0.5?m
Evaporation Crystallization of RDX by Ultrasonic Spray	RDX/oleylamine	ultrasonic crystallisation	100ppm	SEM	1500	nm	± 0.5?m
RDX-based nanocomposite microparticles for significantly reduced shock sensitivity	RDX/PVAc 5:1	spray dry		SEM	10000	nm	spherical Made from ~200nm crystals
Investigation of the crystallization of RDX during spray drying	RDX/PVAc 5:1	spray dry	pneumatic 7um drop	SEM	20	nm	hollow spheres of submicron crystals
Investigation of the crystallization of RDX during spray drying	RDX/PVAc 5:1	spray dry	ultrasonic 50um drop	SEM	150	nm	hollow spheres of submicron crystals
Production of Submicrometer-Sized Hexahydro-1,3,5-trinitro-1,3,5-triazine by Drowning-Out	RDX/PVP	spray into anti solvent	0,1% PVP/RDX 5% RDX acetone	SEM	790	nm	SD 380nm
Evaporation Crystallization of RDX by Ultrasonic Spray	RDX/PVP	ultrasonic crystallisation	100ppm	SEM	1200	nm	± 0.2?m good spheres
Preparation of RDX/Resorcinol-formaldehyde (RF) Nano-composite Energetic Materials by Sol-Gel Method	RDX/RF	sol-gel	in DMF	AFM	38	nm
Continuous formation of submicron energetic particles by the flash-evaporation technique	RDX/TNT	SFE		SEM	150	nm	approx.
Concomitant crystallization for in situ encapsulation of organic materials	RDX/TNT 0,8/0,05	electrospray		SEM	100	nm
Production and Sensitivity Evaluation of Nanocrystalline RDX-based Explosive Compositions	RDX/wax	RESS+dispersion	a	SEM	200	nm	size without wax
Production and Sensitivity Evaluation of Nanocrystalline RDX-based Explosive Compositions	RDX/wax	RESS+dispersion	b	SEM	500	nm	size without wax
Nanoparticle Triaminotrinitrobenzene Fabricated by Carbon Dioxide Assisted Nebulization with a Bubble Dryer	TATB	CAN-BD		SEM	228	nm
Preparation and Characterization of Nano-TATB Explosive	TATB	raw	17mu		17000	nm
Preparation and Characterization of Nano-TATB Explosive	TATB	in a beaker	freeze drying	TEM	60	nm	approx.
PREPARATION OF NANO-TATB BY SEMIBATCH REACTION CRYSTALLIZATION	TATB	in a beaker	surfactant / freeze drying	SEM	50	nm	approx.
Formation of particles of explosives with supercritical fluids	TNT	RESS		Laser Diffraction	10000	nm	median
Preparation and Performance of Nano HMX/TNT Cocrystals	TNT	raw		SEM	3000	nm	elongated
Investigation of CL-20 and RDX Nanocomposites	?CL-20/PVOH	milling+spraydry	with PVOH for milling	SEM	200	nm	phase alpha appear under 200nm
Single-step production and formulation of HMX nanocrystals	??HMX/PVAc 10:1	spray dry		SEM	1000	nm	spherical Made from ~100nm crystals
Preparation of Micronized ?-HMX Using Supercritical Carbon Dioxide as Antisolvent	?HMX	ASES		Laser Diffraction	6300	nm	median / needle like
